# Supplementary material for: Vascular Inflammatory Markers as Predictors of Peripheral Arterial Disease Patients’ Quality-of-Life Changes after Endovascular Treatment
Source: MDPI journal article supplement (doi:10.3390/jcm12103412), 2023-05-11
Supplement: s1 [file s1]

|               | N   | Mean<br>[µg/ml] | SD      |
|---------------|-----|-----------------|---------|
| <b>LTE4</b>   |     |                 |         |
| Preoperative  | 175 | 149,82          | 91,64   |
| Postoperative | 175 | 260,24          | 218,24  |
| 1 day after   | 175 | 103,97          | 159,52  |
| 1M FU         | 174 | 98,18           | 103,32  |
| 3M FU         | 174 | 116,24          | 135,74  |
| 6M FU         | 172 | 97,28           | 81,18   |
| 12M FU        | 168 | 101,97          | 97,26   |
| <b>TBX2</b>   |     |                 |         |
| Preoperative  | 175 | 1760,09         | 2007,76 |
| Postoperative | 175 | 3157,44         | 3124,89 |
| 1 day after   | 175 | 1298,63         | 1641,39 |
| 1M FU         | 174 | 1357,49         | 1404,86 |
| 3M FU         | 174 | 1498,85         | 1711,47 |
| 6M FU         | 170 | 1300,45         | 1900,54 |
| 12M FU        | 166 | 1281,72         | 1408,72 |
| <b>5HETE</b>  |     |                 |         |
| Preoperative  | 175 | 81,44           | 157,73  |
| Postoperative | 175 | 421,05          | 1081,35 |
| 1 day after   | 175 | 124,96          | 320,87  |
| 1M FU         | 174 | 92,91           | 238,25  |
| 3M FU         | 174 | 185,34          | 577,75  |
| 6M FU         | 171 | 236,64          | 856,56  |
| 12M FU        | 168 | 327,01          | 846,98  |

Supplementary Table S1. Concentrations of LTE4, TXB2 and 5HETE at each of the observation time points.
